# Supplementary material for: Mesoporous silica-based abrasion resistant antireflective (AR)-cum-hydrophobic coatings on textured solar cover glasses by a spray coating technique
Source: Royal Society of Chemistry journal article supplement (doi:10.1039/d1ma01141c), 2022-01-01
Supplement: d1ma01141c1.pdf [file d1ma01141c1.pdf]

## Supporting Information

### Mesoporous silica-based abrasion resistant antireflective (AR)-cum-hydrophobic coatings on textured solar cover glasses by spray coating technique

Srikrishna Manna,<sup>1,2</sup> Milan Kanti Naskar<sup>1</sup> and Samar Kumar Medda<sup>1\*</sup>

<sup>1</sup>CSIR-Central Glass and Ceramic Research Institute, 196, Raja S. C. Mullick Road, Kolkata 700032, India

<sup>2</sup>Academy of Scientific and Innovative Research (AcSIR), Ghaziabad-201002

\*Corresponding author; Email: samar@cgcricri.res.in

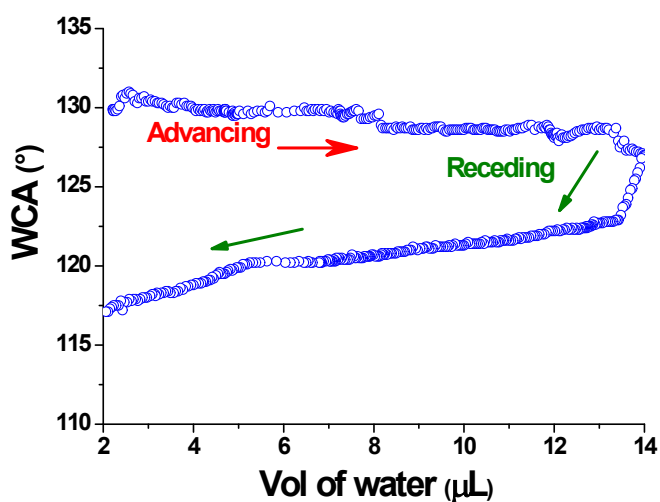

**Fig. S1** Plot showing water contact angle hysteresis of AR coated millimeter scale textured solar cover glass.
